# Supplementary material
Source: MDPI journal article supplement (https://www.mdpi.com/2071-1050/13/24/13878)
Supplement: s1 [file s1]

## Supplementary material

# Life Cycle Assessment of Biocement: An Emerging Sustainable Solution?

Hannah Porter <sup>1</sup>, Abhijit Mukherjee <sup>1</sup>, Rabin Tuladhar <sup>2</sup> and Navdeep K Dhami <sup>1,\*</sup>

<sup>1</sup> Biologically Activated Materials Laboratory, School of Civil and Mechanical Engineering, Curtin University, Bentley, WA 6102, Australia;  
Hannah.porter@postgrad.curtin.edu.au (H.P.);  
abhijit.mukherjee@curtin.edu.au (A.M.)

<sup>2</sup> College of Science and Engineering, James Cook University, Douglas, QLD, Australia;  
rabin.tuladhar@jcu.edu.au

\* Correspondence: navdeep.dhami@curtin.edu.au

## Methods

The purpose of the study was to evaluate the environmental and cost implications of calcium carbonate precipitated through MICP as compared to an equal mass of calcium carbonate precipitated using the commonly used carbonation technique. The purpose of this paper is not to conduct a full life cycle analysis, but rather to compare the environmental impacts of different biological routes to MICP. The aim of this paper is to inform future research and enable the most sustainable and economical biological pathways to MICP to be progressed from laboratory to field applications.

The functional unit (FU) for the assessment was defined as 1 kg of precipitated calcium carbonate. The scenarios included in the analysis are shown in Figure S1. The scope of the assessment for microbially precipitated calcium carbonate included the extraction and processing of raw materials as well as the environmental impact of any by – products produced during the MICP reaction, (Figure S2 ). Transport of raw materials to the plant, and the energy required to operate the fermenter were excluded from the analysis.

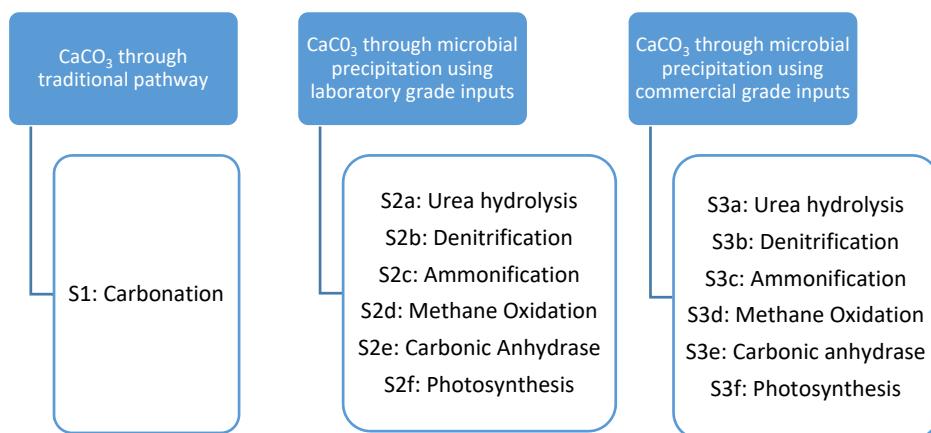

**Figure S1.** Scenarios included in analysis

The following assumptions have been made during the preparation of this environmental assessment:

- For the purpose of this lifecycle assessment the metabolic rate of different pathways to MICP has not been considered.
- It has been assumed that the MICP reactions are 100% efficient and all of the provided calcium source is converted into calcium carbonate.
- Waste products generated by the MICP process have been included in the analysis, however the treatment of these waste products, is outside the scope of this analysis.

- The assessment has been based on ecoinvent, V2.2 database,[1] with adaptations to an Australasian context where available. It is possible that the use of alternative databases may vary the results obtained in this paper. Investigation on alternative database sources is beyond the scope of this investigation.

Input for the production of laboratory grade calcium carbonate through the carbonation process were based on the cradle to gate assessment conducted by Mattila, et al. [2]. The scope of assessment included the extraction and transport of raw materials to the plant, energy requirements for the calcination process and waste produced during the reaction. Inputs assumed for the study of traditionally produced calcium carbonate are shown in Figure S2.

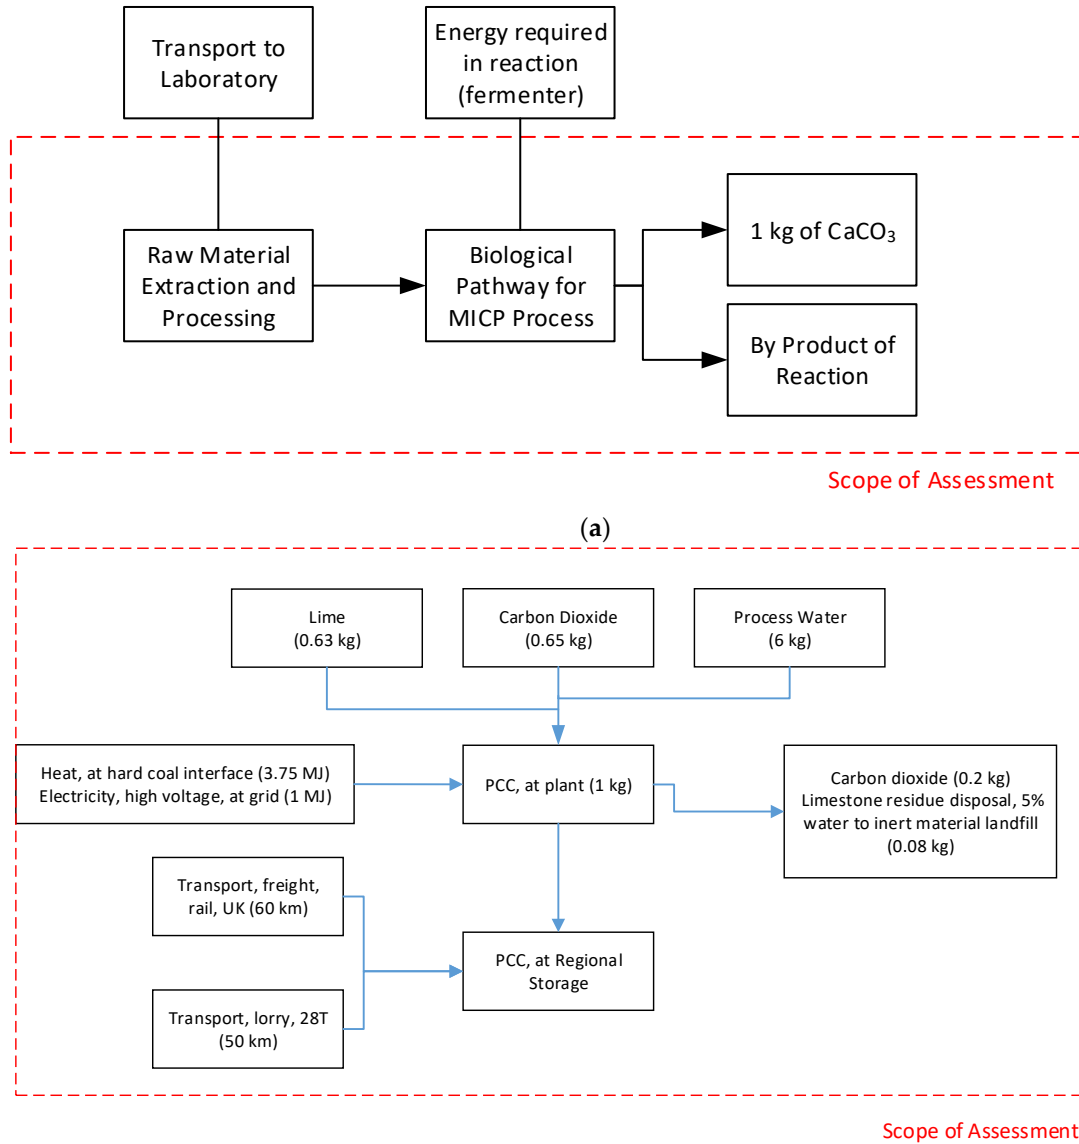

**Figure S2.** Boundaries of Environmental Assessment (a) Biologically precipitated calcium carbonate (b) Laboratory grade calcium carbonate, [2]

The assessment was conducted using SimaPro 8.0 software. The ecoinvent V2.2 database[1], was used for material inputs, with adaptations to an Australasian context where available. The carbon footprint and eutrophication potential were calculated using AUSLCI Version 3.0 while the embodied energy for each scenario was calculated using the Cumulative Energy Demand 2.01 methodology.

A summary of the required inputs and waste products for each microbial pathway is provided in Table S1. Chemical inputs required for the MICP reaction pathways were based on published experimental results as shown in Table S1.

**Table S1.** Summary of inputs / outputs for production of 1 kg of CaCO<sub>3</sub> through microbial route

| Pathway                               | Inputs / Waste                    | Source                                                                              |
|---------------------------------------|-----------------------------------|-------------------------------------------------------------------------------------|
| Urea hydrolysis                       | - 0.6 kg urea                     | van Paassen [3],<br>Van Paassen [4]                                                 |
|                                       | - 1.1 kg calcium chloride         |                                                                                     |
|                                       | - 0.1 kg yeast extract            |                                                                                     |
|                                       | - 15 kg water                     |                                                                                     |
|                                       | - 0.72 kg ammonium waste          |                                                                                     |
| Denitrification                       | - 0.68 kg sodium nitrate          | Hamdan, et al. [5]<br>Van Paassen, et al. [6]                                       |
|                                       | - 1.1 kg calcium chloride         |                                                                                     |
|                                       | - 0.1 kg yeast extract            |                                                                                     |
|                                       | - 0.00135 kg potassium phosphate  |                                                                                     |
|                                       | - 0.0012 kg magnesium sulphate    |                                                                                     |
|                                       | - 25 kg water                     |                                                                                     |
|                                       | - 0.056 kg nitrogen waste         |                                                                                     |
| Ammonification                        | - 1.6 kg calcium acetate          | Rodriguez-Navarro, et al. [7]<br>González-Muñoz, et al. [8]<br>Chekroun, et al. [9] |
|                                       | - 0.256 kg yeast extract          |                                                                                     |
|                                       | - 0.640 kg glucose                |                                                                                     |
|                                       | - 20 kg water                     |                                                                                     |
|                                       | - 0.18 kg ammonia waste           |                                                                                     |
| Methane Oxidation                     | - 1.1 kg calcium chloride         | Ganendra, et al. [10]<br>Whittenbury, et al. [11]                                   |
|                                       | - 0.005 kg magnesium sulphate     |                                                                                     |
|                                       | - 0.005 kg potassium nitrate      |                                                                                     |
|                                       | - 6.8E-5 kg potassium phosphate   |                                                                                     |
|                                       | - 1.79E-4 kg sodium phosphate     |                                                                                     |
|                                       | - 0.00016 kg methanol             |                                                                                     |
|                                       | - 0.160 kg methane gas            |                                                                                     |
|                                       | - 0.01 kg chelated iron solution  |                                                                                     |
|                                       | - .0025 kg trace element solution |                                                                                     |
|                                       | - 20 kg water                     |                                                                                     |
|                                       | - 0.34 kg hydrogen sulphide waste |                                                                                     |
| Carbonic anhydrase producing bacteria | - 1.1 kg calcium chloride         | Kaur, et al. [12]<br>Dhami, et al. [13]                                             |
|                                       | - 0.88 kg carbon dioxide          |                                                                                     |
|                                       | - 0.025 kg sodium chloride        |                                                                                     |
|                                       | - 0.0075 kg yeast extract         |                                                                                     |
|                                       | - 0.0075 kg beef extract          |                                                                                     |
|                                       | - 0.025 kg peptone                |                                                                                     |
|                                       | - 1.67E-6 kg zinc sulphate        |                                                                                     |
|                                       | - 25 kg water                     |                                                                                     |
|                                       | - 0.44 kg carbon dioxide waste    |                                                                                     |
| Photosynthesis                        | - 1.1 kg calcium chloride         | Zhu and Dittrich [14]<br>Dittrich, et al. [15]                                      |
|                                       | - 0.88 kg carbon dioxide          |                                                                                     |
|                                       | - 1.68 kg sodium bicarbonate      |                                                                                     |
|                                       | - 25 kg water                     |                                                                                     |
|                                       | - 0.44 kg carbon dioxide waste    |                                                                                     |

In the case of laboratory grade scenarios calcium chloride was produced through the commonly used Solvay process, [16]. In the case of commercial grade sources, laboratory grade calcium chloride was

substituted with calcium chloride produced through the hypochlorination of allyl chloride, a co – product of the production of epichlorohydrin [17]. Laboratory grade sodium nitrate, (used for MICP via denitrification) was also replaced with a commercial nitrate fertilizer equivalent,[18].

A high-level cost assessment was conducted on all raw materials for each scenario. Unit rates for laboratory grade chemicals were sourced from laboratory chemical suppliers in Australia whilst rates for commercial grade chemicals were sourced from ICIS bulk chemical reports, [19]. Unit rates for laboratory and commercial grade chemicals are detailed in Table S2 and Table S3.

**Table S2.** Unit Rates for Laboratory Grade Chemicals

| <b>Product</b>         | <b>Unit Rate (AUD) / kg</b> | <b>Source</b>                  |
|------------------------|-----------------------------|--------------------------------|
| Beef extract           | 204.4                       | Southern-Biological [20]       |
| Calcium carbonate      | 60.8                        | Chemsupply[21]                 |
| Calcium chloride       | 50.6                        | Chemsupply[21]                 |
| Chelated iron solution | 151                         | Sigma-Aldrich [22]             |
| Glucose                | 37                          | Chemsupply[21]                 |
| Magnesium sulphate     | 43                          | Chemsupply[21]                 |
| Methane gas            | 49.5                        | Commonwealth-of-Australia [23] |
| Methanol               | 11.75                       | Chemsupply[21]                 |
| Peptone                | 115.5                       | Southern-Biological [24]       |
| Potassium nitrate      | 55.6                        | Chemsupply[21]                 |
| Sodium bicarbonate     | 26                          | Chemsupply[21]                 |
| Sodium chloride        | 19.67                       | Chemsupply[21]                 |
| Sodium nitrate         | 48.6                        | Chemsupply[21]                 |
| Sodium phosphate       | 67                          | Chemsupply[21]                 |
| Trace element solution | 1362.4                      | MPBio [25]                     |
| Urea                   | 64                          | Chemsupply[21]                 |
| Water                  | 0.0027                      | ABS [26]                       |
| Yeast Extract          | 129.8                       | Southern-Biological [27]       |
| Zinc sulphate          | 23                          | Chemsupply[21]                 |

**Table S3.** Unit Rates for Commercial Grade Chemical Replacements

| <b>Product</b>         | <b>Unit Rate (AUD) / kg</b> | <b>Source</b>             |
|------------------------|-----------------------------|---------------------------|
| Beef extract           | 22.4                        | eBioChem [28]             |
| Calcium acetate        | 1.4                         | PulisiChem [29]           |
| Calcium chloride       | 0.34                        | ICIS [19]                 |
| Chelated iron solution | 39                          | Bunnings [30]             |
| Glucose                | 0.64                        | Melbourne-Food-Depot [31] |
| Magnesium sulfate      | 0.54                        | ICIS [19]                 |
| Methanol               | 2.98                        | ICIS [19]                 |
| Sodium bicarbonate     | 0.68                        | ICIS [19]                 |
| Sodium chloride        | 0.284                       | Bunnings [32]             |
| Sodium nitrate         | 6.6                         | Amazon [33]               |
| Sodium phosphate       | 2.38                        | ICIS [19]                 |
| Urea                   | 0.81                        | ICIS [19]                 |
| Yeast extract          | 22.4                        | eBioChem [28]             |
| Zinc sulphate          | 0.92                        | ICIS [19]                 |

## References

- [1] J.N. Frischknecht R., Althaus H.-J., Dokat G., Dones R., Heck T., Hellweg S., Hirschier R., Nemecek T., Rebitzer G., Spielmann M, The ecoinvent database: Overview and methodological framework, *International Journal of Life Cycle Assessment*, **2005**, 3-9.
- [2] H.-P. Mattila, H. Hudd, R. Zevenhoven, Cradle-to-gate life cycle assessment of precipitated calcium carbonate production from steel converter slag, *Journal of Cleaner Production*, **2014**, *84*, 611-618.
- [3] L.A. van Paassen, Harkes, M.P., van Zwieten, G.A., van der Zon, W.H., van der Star, W.R.L., van Loosdrecht, M.C.M., Scale up of BioGrout: a biological ground reinforcement method, in: M. Hamza, Shahien, M., El-Mossallamy, Y. (Ed.) 17th International Conference on Soil Mechanics and Geotechnical Engineering, IOS Press, Alexandria, Egypt, 2009, pp. 2328-2333.
- [4] L.A. Van Paassen, Ghose, Ranajit, van der Linden, Thomas J. M., van der Star, Wouter R. L., van Loosdrecht, Mark C. M., Quantifying Biomediated Ground Improvement by Ureolysis: Large-Scale Biogrout Experiment, *Journal of Geotechnical and Geoenvironmental Engineering*, **2010**, *136*, 1721-1728.
- [5] N. Hamdan, E. Kavazanjian, B.E. Rittmann, I. Karatas, Carbonate Mineral Precipitation for Soil Improvement Through Microbial Denitrification, *Geomicrobiology Journal*, **2017**, *34*, 139-146.
- [6] L.A. Van Paassen, C.M. Daza, M. Staal, D.Y. Sorokin, W. van der Zon, M.C.M. van Loosdrecht, Potential soil reinforcement by biological denitrification, *Ecological Engineering*, **2010**, *36* 168-175.
- [7] C. Rodríguez-Navarro, M. Rodríguez-Gallego, K. Ben Chekroun, M.T. Gonzalez-Muñoz, Conservation of Ornamental Stone by *Myxococcus xanthus*-Induced Carbonate Biomineralization, *Applied and Environmental Microbiology*, **2003**, *69*, 2182-2193.
- [8] M.T. González-Muñoz, C. Rodríguez-Navarro, F. Martínez-Ruiz, J.M. Arias, M.L. Merroun, M. Rodríguez-Gallego, Bacterial biomineralization: new insights from *Myxococcus*-induced mineral precipitation, *Geological Society, London, Special Publications*, **2010**, *336*, 31-50.
- [9] K.B. Chekroun, C. Rodríguez-Navarro, M.T. González-Muñoz, J.M. Arias, G. Cultrone, M. Rodríguez-Gallego, Precipitation and Growth Morphology of Calcium Carbonate Induced by *Myxococcus Xanthus*: Implications for Recognition of Bacterial Carbonates, *Journal of Sedimentary Research*, **2004**, *74*, 868-876.
- [10] G. Ganendra, W. De Muynck, A. Ho, E.C. Arvaniti, B. Hosseinkhani, J.A. Ramos, H. Rahier, N. Boon, Formate Oxidation-Driven Calcium Carbonate Precipitation by *Methylocystis parvus* OBBP, *Applied and Environmental Microbiology*, **2014**, *80*, 4659-4667.
- [11] R. Whittenbury, K.C. Phillips, J.F. Wilkinson, Enrichment, Isolation and Some Properties of Methane-utilizing Bacteria, *Microbiology*, **1970**, *61*, 205-218.
- [12] G. Kaur, N.K. Dhami, S. Goyal, A. Mukherjee, M.S. Reddy, Utilization of carbon dioxide as an alternative to urea in biocementation, *Construction and Building Materials*, **2016**, *123*, 527-533.
- [13] N.K. Dhami, M.S. Reddy, A. Mukherjee, Synergistic Role of Bacterial Urease and Carbonic Anhydrase in Carbonate Mineralization, *Applied Biochemistry and Biotechnology*, **2014**, *172*, 2552-2561.
- [14] T. Zhu, M. Dittrich, Carbonate Precipitation through Microbial Activities in Natural Environment, and Their Potential in Biotechnology: A Review, *Frontiers in Bioengineering and Biotechnology*, **2016**, *4*, 4.
- [15] M. Dittrich, B. Müller, D. Mavrocordatos, B. Wehrli, Induced Calcite Precipitation by *Cyanobacterium Synechococcus*, *Acta hydrochimica et hydrobiologica*, **2003**, *31*, 162-169.
- [16] R. Hirschier, Ossés, M., Primas, A., Kunst, H., Calcium chloride, CaCl<sub>2</sub> at regional storage, , Ecoinvent database version 2.2, 2007., <https://ecoinvent.org/the-ecoinvent-database/data-releases/ecoinvent-version-2/>, (accessed 9 October 2021)
- [17] R. Hirschier, Chudacoff, M., Jungbluth, N., Calcium chloride produced through the hypochlorination of allyl chloride, Ecoinvent database version 2.2, 2007., <https://ecoinvent.org/the-ecoinvent-database/data-releases/ecoinvent-version-2/>, (accessed 9 October 2021)

- [18] N. Nemecek, . Kägi, T., Althaus, H.J., Hirsch, R., Osses, M., Urea Ammonium Nitrate, at regional storehouse, Ecoinvent database version 2.2, 2007., <https://ecoinvent.org/the-ecoinvent-database/data-releases/ecoinvent-version-2/>, (accessed 9 October 2021)
- [19] ICIS, Chemicals - Price Reports, in: ICIS (Ed.), 2017.
- [20] Southern-Biological, MED5.20 - Beef extract 'Lab Lemco' powder Southern Biological, Australia, 2017.
- [21] Chemsupply, Chemsupply Online Catalogue, Chemsupply, Port Adelaide, South Australia, 2017.
- [22] Sigma-Aldrich, Iron Chelate Solution, in: Sigma-Aldrich (Ed.), Sigma-Aldrich, Australia, 2017.
- [23] Commonwealth-of-Australia, Gas Price Trends Review - Revision 1, Commonwealth of Australia, Canberra, ACT, Australia, 2016, pp. 202.
- [24] Southern-Biological, MED8.20 - Peptone powder, in: Southern-Biological (Ed.), Southern-Biological, Australia, 2017.
- [25] MPBio, Trace Element Solution 1 (1000 X), MPBIO, 2017.
- [26] ABS, Media Release: Water Account, Australia, ABS, Australia, 2013.
- [27] Southern-Biological, MED4.10 - Nutrient borth no. 2 powder, Southern-Biological, Australia, 2017.
- [28] eBioChem, Wholesale Yeast Extract, eBioChem, 2017.
- [29] PulisiChem, Industrial Grade Calcium Acetate, Shandong-Pulisi-Chemical Co., 2017.
- [30] Bunnings, Manutec 300g Iron Chelate, Bunnings, Australia, 2017.
- [31] Melbourne-Food-Depot, Dextrose Monohydrate Powder 1 kg, Melbourne-Food-Ingredient-Depot, Australia, 2017.
- [32] Bunnings, Pool Salt, Bunnings, Australia, 2017.
- [33] Amazon, 25 lb Sodium Nitrate (99%), Duda Energy, Amazon, 2017.
